## **The Selenoprotein P 3' untranslated region is an RNA binding protein platform that fine tunes selenocysteine incorporation**

Sumangala P. Shetty<sup>1</sup>, Nora T. Kiledjian<sup>1</sup> and Paul R. Copeland<sup>1\*</sup>

<sup>1</sup>Department of Biochemistry and Molecular Biology, Rutgers Robert Wood Johnson Medical School, Piscataway, NJ, USA

\*To whom correspondence should be addressed. Tel:001-732-235-4670; Fax: 732-235-5223; Email: paul.copeland@rutgers.edu

## ABSTRACT

Selenoproteins contain the 21st amino acid, selenocysteine (Sec), which is incorporated at select UGA codons when a specialized hairpin sequence, the Sec insertion sequence (SECIS) element, is present in the 3' UTR. Aside from the SECIS, selenoprotein mRNA 3' UTRs are not conserved between different selenoproteins within a species. In contrast, the 3'-UTR of a given selenoprotein is often conserved across species, which supports the hypothesis that cis-acting elements in the 3'-UTR other than the SECIS exert post-transcriptional control on selenoprotein expression. In order to determine the function of one such SECIS context, we chose to focus on the plasma selenoprotein, SELENOP, which is required to maintain selenium homeostasis as a selenium transport protein that contains 10 Sec residues. It is unique in that its mRNA contains two SECIS elements in the context of a highly conserved 843-nucleotide 3' UTR. Here we have used RNA affinity chromatography and identified PTBP1 as the major RNA binding protein that specifically interacts with the sequence between the two SECIS elements. We then used CRISPR/Cas9 genome editing to delete two regions surrounding the first SECIS element. We found that these sequences are involved in regulating SELENOP mRNA and protein levels, which are inversely regulated as a function of selenium concentrations.

**Keywords:** translation, mRNA, SECIS element, selenocysteine, RNA binding protein

**Abbreviations:** PTBP1, polypyrimidine tract binding protein 1; SECIS, selenocysteine insertion sequence, SELENOP, selenoprotein P; SBP2, SECIS binding protein 2; UTR, untranslated region;

## INTRODUCTION

The role of untranslated regions (UTRs) in post transcriptional gene regulation is well established. A pointed example of this is the requirement for a specific 3' UTR sequence that directs selenocysteine (Sec) incorporation. Sec is incorporated into specific sites within 25 human proteins at specific UGA codons, which would otherwise signal translation termination. Sec incorporation requires a stem-loop structure in the 3' UTRs of mammalian selenoprotein mRNAs known as a Sec insertion sequence (SECIS) element. While the SECIS element is known to be necessary and sufficient for Sec incorporation, albeit with varying efficiency [1], the role of surrounding sequences in the extremely diverse array of selenoprotein 3' UTRs has only recently been the subject of investigation. For example, the sequence upstream of the selenoprotein S (SELENOS) SECIS element regulates Sec incorporation via two adjacent but non-overlapping sequences that both positively and negatively impact Sec incorporation efficiency [2]. In terms of cellular context, SELENOS mRNA levels have been reported to change in response to cytokines [3], but a connection to modulation of Sec incorporation by regulatory sequences in the 3' UTR has not yet been made. The potential for other examples of regulation is substantial considering that the size of selenoprotein mRNA 3' UTRs range from ~300 to ~6000 nt [4].

All but one of the human selenoproteins contain a single Sec codon in their coding region, and a single SECIS element in their 3' UTRs. The exception to this is selenoprotein P (*SELENOP*), which in humans contains 10 Sec codons and 2 SECIS elements in the 3'UTR. The two SECIS elements sit in the context of 843 nt of well-conserved sequence. As such, *SELENOP* provides a unique example to study the role of non-SECIS 3' UTR sequences. As a hepatokine regulator of whole body selenium, *SELENOP* mRNA and protein levels are regulated by a multitude of physiological conditions including insulin levels, exercise and, of course, selenium availability [reviewed in 5]. Since *SELENOP* supports general selenoprotein synthesis by delivering

selenium to the extrahepatic tissues, it is a key player in maintaining cellular selenium homeostasis and redox balance through the myriad of selenoenzymes that resolve oxidative stress. In addition, SELENOP itself has a thioredoxin motif that may directly be involved in maintaining redox balance [6]. Several previous studies have analyzed the effects of deletions in the SELENOP 3' UTR but only in the context of transfected cells or in vitro translation, and no function could be ascribed to the non-SECIS portions of the UTR [7–9]. To date, no studies have revealed a specific role of 3' UTR sequences in mediating regulation.

Using RNA affinity chromatography, we have identified the polypyrimidine tract-binding protein (PTBP1) as one of several RNA binding proteins that interacts specifically with conserved regions of the SELENOP 3' UTR. Coupling genomic mutagenesis, UV crosslinking and metabolic labeling with <sup>75</sup>Se, we found that these regions are required for moderating SELENOP expression in response to varying selenium concentration and oxidative stress.

## RESULTS

### Identification of interSECIS RNA binding proteins

The 843 nucleotide (nt) human SELENOP 3' UTR is highly conserved among mammals (76% identity) and as shown in Figure 1 can be divided into 5 regions: 1) the sequence upstream of SECIS-1, hereafter the “preSECIS” region (254 nt); 2) SECIS-1 (83 nt); 3) the sequence between the two SECIS elements, hereafter the “interSECIS” region (358 nt); 4) SECIS-2 (81 nt); 5) the sequence downstream of SECIS-2 (63 nt). Since large, conserved AU-rich 3' UTRs are a hallmark of post-transcriptional regulation, it is very likely that the AU-rich SELENOP 3' UTR (overall 71% AU) is targeted by one or more RNA binding proteins. With an initial focus on the sequence between the two SECIS elements, we performed RNA affinity chromatography based on the MS2 RNA/MS2 coat protein interaction [10]. Three MS2-tagged RNAs were used as bait: 1) full-length rat SELENOP 3' UTR, 2) a mutant SELENOP 3' UTR with the interSECIS region deleted ( $\Delta$ interSECIS) and an unrelated control RNA that had a similar GC content and the same length. These RNAs were synthesized in vitro and attached to glutathione agarose magnetic beads that had been pre-bound with GST-tagged MS2 coat protein, which binds with high affinity to the MS2 RNA sequence tag. The RNA-bound beads were incubated with rat liver extract and the bound proteins were eluted with high salt after extensive washing. Figure 2A shows SDS PAGE analysis of the proteins that eluted from the SELENOP 3' UTR and control RNA. We observed a series of bands at ~65 kDa that specifically eluted from the wild-type SELENOP 3' UTR but not the control RNA or the  $\Delta$ interSECIS mutant. To identify these proteins, the bands were excised from the gel and subjected to LC MS/MS. The predominant peptides corresponded to the polypyrimidine tract binding protein 1 (PTBP1). It is likely that the other bands correspond to some of the known PTBP1 isoforms (there are 7 transcript variants listed in the NCBI RefSeq database). To verify the identity of these bands, we repeated the RNA

affinity chromatography using human hepatoma cell (HepG2) lysate. Figure 2B shows that we obtained a similar result with three bands in the ~65 kDa range eluting specifically from the SELENOP 3' UTR. Immunoblot analysis using anti-PTBP1 monoclonal antibody confirmed that the eluted proteins are recognized by the antibody (Figure 2C). Since PTBP1 is an abundant pleiotropic RNA binding protein with known roles regulating pre-mRNA splicing, translation, NMD resistance and mRNA stability [reviewed in 11], these results suggest that a PTBP1 ribonucleoprotein particle may play a regulatory role in SELENOP translation or mRNA stability.

### Direct binding of PTBP1 to the SELENOP 3' UTR.

In order to determine if PTBP1 directly binds to the SELENOP 3' UTR, we performed UV crosslinking analysis using purified recombinant GST-tagged PTBP1 (GST-PTBP1). For this assay we generated [<sup>32</sup>P]-UTP-labeled RNA fragments corresponding to full length SELENOP 3' UTR and 4 other versions with targeted substitutions. Figure 3A shows the canonical PTBP1 binding sites in the human SELENOP 3' UTR (green arrows), indicating a broad spectrum of potential interaction sites. In this case we are using UV crosslinking as a non-quantitative approach that reveals the location of binding rather than affinity. We sought to narrow down the location of PTBP1 binding by generating three mutated versions of the SELENOP 3' UTR with the patches of U-rich sequences changed to random U-free sequences (Figure 3B, Mut1-3). In addition we generated a fourth mutant in which nearly all of the U residues in the interSECIS region were changed to A (Mut4). These fragments were labeled with <sup>32</sup>P UTP and subjected to UV crosslinking analysis with GST-PTB. Figure 3C shows that deletion of individual patches of PTB binding sites did not eliminate binding but the alteration of all three sites significantly reduced crosslinking signal. The lack of signal for Mut4 indicates that the remaining labeled U residues in the preSECIS region are not the primary binding sites for PTBP1. The residual signal that is observed in the mut4 lane may represent low affinity interactions in this region. This is consistent with the slight reduction of PTBP1 peptides recovered from the ΔpreSECIS

mutant (Figure 6G below). This result establishes that the primary binding site of PTBP1 *in vitro* is in the interSECIS region rather than at the sites upstream of SECIS 1.

## Deletion analysis using CRISPR/Cas9.

In order to reveal regulatory functions for the non-SECIS regions of the SELENOP 3' UTR *in vivo*, we generated genomic deletions of these sequences in HepG2 cells using CRISPR/Cas9. For the preSECIS region we used single guide RNAs (sgRNAs) targeting the sequence 26 nt downstream of the stop codon and 55 nt upstream of SECIS-1. For the interSECIS region we used a set of sgRNAs targeting the sequence 37 nts downstream of SECIS-1 and 45 nts upstream of SECIS-2 (Figure 4A). The sgRNAs were nucleofected along with a GFP vector into HepG2 cells and after 48 hours, the top 3% of fluorescent cells were sorted into a 96-well plate in a single-cell format. Upon confluence, the clonal populations were analyzed for genomic deletion by PCR of genomic DNA. As shown in Figure 4A, sequencing of PCR fragments confirmed that the expected fragments were eliminated, and genomic PCR verified the deletion (Figure 4B, left panel). We also confirmed the genomic deletions by RT-PCR of RNA derived from the deletion clones (Figure 4B, right panel). To determine whether the mutated versions of SELENOP mRNA were compromised in their ability to bind PTBP1, we performed RNA immunoprecipitation (RNA-IP). HepG2 lysates from wild-type and mutated lines were incubated with anti-PTBP1 antibody or anti-FLAG antibody as a control. RNA was extracted from the immunoprecipitated material and limited cycle RT-PCR was performed to estimate the recovery of SELENOP mRNA. Figure 4D shows that SELENOP mRNA was easily detectable from the wild-type and to a lesser extent from the  $\Delta$ preSECIS sample, but it was barely detectable from the  $\Delta$ interSECIS sample. While this assay is only semi-quantitative, it illustrates a substantial defect in PTBP1 binding in the  $\Delta$ interSECIS cells.

## Role of the non-SECIS regions during oxidative stress

Considering the role of selenoproteins in responding to oxidative stress, we hypothesized that SELENOP expression would be modulated by peroxide stress as has been shown for other selenoproteins [12]. We chose peroxide stress as a tool for inducing ROS in mammalian cell culture since it is a well-established method to induce stress in HepG2 cells [13]. To assess the effect of peroxide stress on SELENOP expression, we treated wild type and deletion mutant HepG2 cells with a range of hydrogen peroxide concentrations (5 - 1000  $\mu$ M) in the presence of  $^{75}\text{Se}$ -selenite. Figure 5A shows immunoblot and phosphorimage analysis of the conditioned media. Note, in most cell types, two forms of SELENOP are expressed from the same mRNA: the full length protein and a truncated version resulting from translation termination at the 2nd UGA (Sec) codon. These migrate at 62 and 55 kDa respectively due to glycosylation. In order to improve electrophoretic resolution of the SELENOP bands, the media was treated with PNGaseF, which removes both N- and O-linked glycosylation. After such treatment, the full length and truncated versions of SELENOP migrate at 42 and 37 kDa respectively. Quantification of the radiolabeled SELENOP revealed a slight but consistent increase in full length protein expression in both the preSECIS and interSECIS deletion mutants, particularly at the 5  $\mu$ M peroxide level (Figure 5B). Although this difference was observed for both mutants, only deletion of the preSECIS region resulted in a statistically significant increase in SELENOP expression at 5  $\mu$ M peroxide treatment. While we did not attempt to perform quantitative immunoblot analysis, the blots revealed that the ratio of full length to truncated SELENOP did not significantly decrease as a result of peroxide treatment, and the mutations did not cause a substantive change in the ratio. In addition, the peroxide treatment did not affect intracellular selenoprotein synthesis as shown by examining the  $^{75}\text{Se}$ -selenite-labeled cell lysates (Figure S2). These results indicate that the pre- and interSECIS sequences may be required to



fine-tune SELENOP expression but that SELENOP expression is not substantively impacted by peroxide exposure.

In order to determine the contribution of RNA concentration to the change in SELENOP expression, we performed qRT-PCR. Figure 5C shows that the deletions had opposing effects where the preSECIS deletion caused a ~25% reduction in mRNA levels while the interSECIS deletion caused ~75% increase. These opposing effects indicate that the efficiency of SELENOP protein production is increased when the preSECIS sequence is deleted and decreased for the interSECIS deletion. Interestingly, we reproducibly observed a spike of  $\Delta$ preSECIS mRNA expression at the 5  $\mu$ M dose of peroxide but this spike was not observed for the  $\Delta$ interSECIS mutant mRNA. This finding further supports a complex interplay between regulation of mRNA levels and translation efficiency to allow SELENOP regulation.

## Selenium supplementation reveals a role for PTB binding sites in regulating translational efficiency

In addition to peroxide stress, we also analyzed the effect of altered selenium concentrations. Since standard HepG2 culture conditions are typically selenium deficient, we first determined the effect of cold selenium supplementation on SELENOP expression. Figure 6A shows immunoblot analysis of SELENOP over a range of selenium supplementation from 10 to 100 nM. We observed a striking increase in SELENOP expression that was similar in the wild-type and mutated cell lines. Additionally, we observed a significant increase in SELENOP production from the  $\Delta$ preSECIS versus wild-type cell line. To get a more quantitative picture of the effect of selenium supplementation on the amounts of full length and truncated SELENOP, we used  $^{75}\text{Se}$ -selenite in varying amounts. Interestingly we observed a peak of labeling at 50 nM (Figure 6B), likely due to this being the optimal specific activity for detecting incorporation of labeled selenium while the overall concentration is still limiting (i.e. all or most of the supplemental

selenium is being incorporated at the 50 nM concentration). When comparing the amount of SELENOP labeling (Figure 6B, upper panel), we observed about 50% more total SELENOP signal in the  $\Delta$ preSECIS mutant than in the wild-type or  $\Delta$ interSECIS mutant cells at the 50 nM level (Figure 6C). Analysis of the lysate did not reveal any statistically significant changes in incorporation that correlated with either of the mutations (Figure 6B, lower panel and Figure 6D). Interestingly, the corresponding RNA analysis by qRT-PCR revealed a significant drop in RNA levels for the  $\Delta$ preSECIS mutant cells (Figure 6E) such that the inferred translational efficiency (protein:RNA ratio) was almost 3 times higher for the  $\Delta$ preSECIS condition (Figure 6F). These results further reveal roles for the non-SECIS regions of the SELENOP 3' UTR in fine tuning SELENOP expression.

In an effort to reveal specific interactions in the preSECIS region, we repeated the RNA affinity chromatography using the control RNA, the full length 3' UTR and a mutant UTR lacking the first 273 nt of the 3' UTR, thus deleting the preSECIS region plus the 5' portion of SECIS-1 ( $\Delta$ 273). These RNAs were incubated with rat hepatoma (McArdle 7777) cell lysate and the entire chromatographic eluate was submitted for LC MS/MS analysis. Figure 6G shows the list of top hits that showed significant selectivity for the SELENOP 3' UTR (top hits correspond to those with 10 more peptides detected). Besides the PTBP isoforms, abundant peptides were recovered from other RNA binding proteins. Both RAVR1 and MATR3 are known PTBP1 cofactors, but ELAV1 and RBM47 may be independently interacting with the SELENOP 3' UTR. All of the PTBP isoforms and known PTBP interacting proteins ([14]; RAVR1 and MATR3) were also recovered by the  $\Delta$ 273 mutant RNA confirming that the interSECIS region is primarily responsible for assembly of the PTBP-dependent RNP. Interestingly, there were some proteins identified that appear to be specifically interacting with the preSECIS region (e.g. ELAV1, RBM47, HNRNPLL, CCAR2 and HNRNPK), which are candidates for factors that regulate the efficiency of *SELENOP* translation. Overall these results confirm the initial identification of

PTBP1 as a SELENOP 3' UTR binding protein, and expand the list of candidates that may play roles in fine tuning SELENOP expression either through modulating translation or mRNA stability. Notably, most of the proteins identified are primarily nuclear, raising the possibility that the SELENOP mRNP is assembled in the nucleus prior to export.

## DISCUSSION

All selenoprotein 3'UTR's contain an approximately 100 nt SECIS element required for recoding a UGA to allow Sec incorporation. However, most selenoprotein 3'UTR's contain long sequences adjacent to the SECIS element with no known function. It is therefore likely that selenoprotein 3' UTRs contain regulatory motifs in their 3' UTRs. Such motifs in a broad spectrum of mammalian mRNAs have been revealed over the last several decades as key regulators of translation, mRNA localization and mRNA decay [reviewed in 15]. Naturally, RNA binding proteins are key players in most 3' UTR-mediated regulatory processes, many serving as a platform for highly complex ribonucleoprotein complexes. One of the many pleiotropic RNA binding proteins that falls in this category is polypyrimidine tract binding protein (PTBP1), which has demonstrated roles in regulating pre-mRNA splicing, translation, NMD resistance and mRNA stability [reviewed in 11]. Here we have found that the SELENOP 3' UTR is a platform that binds PTBP1 and other RNA binding proteins that are likely playing a role in regulating the efficiency of SELENOP synthesis.

The human SELENOP mRNA contains multiple U-rich sequences, many of which are canonical PTBP1 binding sites (Figure 3). The fact that these sites cluster in the region upstream and downstream of SECIS-1 is consistent with our experimental determination that PTBP1 directly interacts with these regions, although the sites upstream of SECIS1 do not seem to play a major role in direct PTBP1 binding. The genomic deletion of regions containing PTBP1 binding sites revealed potential roles in regulating translation since we observed significant changes in the protein/mRNA ratios. While we cannot rule out transcriptional and protein stability components to this result, a role in translation regulation is consistent with prior roles assigned to PTBP1 outside of its canonical role in pre-mRNA splicing. The observed change in protein/mRNA ratios was driven to some extent by changes in steady state mRNA levels with preSECIS deletion causing a decrease in mRNA and interSECIS causing a general increase. Interestingly, we

observed a disconnect between the demonstrated PTBP1 binding sites in the interSECIS region and the stronger effects on expression when the preSECIS region was deleted. This likely points to the importance of other RNA binding proteins in the 5' portion of the 3' UTR that may function independently of PTBP1. Although the magnitude of effects observed were relatively small, the reproducible changes observed as a result of peroxide exposure suggest that stress response is an important aspect of SELENOP regulation. We expect future work to reveal conditions where PTBP1 function is required to regulate SELENOP levels in vivo. For example, SELENOP mRNA levels have been reported to dramatically increase in response to exercise stress in mice fed a normal diet but not those fed a high fat diet [16]. We expect the molecular pathways that regulate such a response to work at least in part through the mechanisms uncovered in this report.

This study has also revealed a role for the non-SECIS sequences in response to varying selenium levels. As the major carrier of blood-borne selenium, SELENOP synthesis is necessarily tightly linked to the available selenium concentration. Notably, we observed that the  $\Delta$ preSECIS mutation caused a ~2-fold reduction in steady state mRNA levels with a concomitant and unexpected 50% increase in protein production. This apparent increased translational efficiency may suggest that the efficiency of SELENOP production is kept at a moderate level in order to balance the consumption of limiting selenium to allow adequate intracellular selenoprotein production. Alternatively, the attenuation of SELENOP expression as a function of the preSECIS region may be required to maximize the processivity of multiple Sec incorporation events, considering the prior work that showed significant ribosomal pausing at the first UGA codon [8,17].

It will be challenging to determine the mechanism of action for these sequences because extensive analysis of SELENOP synthesis in vitro and in transfected cells has failed to reveal a role for the sequences surrounding the SECIS elements [9,18]. Considering that the results

obtained here indicate a regulatory role for the region surrounding SECIS-1, it is likely that the functional RNP complex may form co-transcriptionally and coincident with RNA splicing. Considering the high concentration of PTBP1 in the nucleus and its role in splicing, it is logical that it binds to SELENOP pre-mRNA and stays associated to be exported in a conformation that is able to respond to cellular conditions. In the case of oxidative stress, it is possible that the complex constituents are altered, allowing regulated SELENOP expression. The idea that an active SELENOP mRNP may form during pre-mRNA processing may explain why we have been unsuccessful in trying to express detectable protein from transfected cDNA (11). One of the most likely mechanisms by which 3' UTR sequences would affect selenoprotein expression is by modulating SECIS function, either by blocking or possibly even enhancing SBP2 access or affinity. The proximity of the PTBP1 binding sites to SECIS-1, which is sufficient to support full length SELENOP synthesis in vitro and in transfected cells (8), certainly supports this hypothesis. However, if SECIS access were a general mechanism of regulation, then one would expect the sequences and binding proteins to be conserved. The stark lack of conservation among selenoprotein 3' UTR sequences strongly suggests that independent mechanisms evolved to respond to very specific regulatory demands.

## MATERIAL AND METHODS

### CRISPR/Cas9 genome editing

Two guide RNAs against the interSECIS region of SELENOP 3'UTR (Figure S3) were synthesized and cloned separately into pSpCas9(BB)-2A-Puro (PX459) V2.0 [19]. This vector was a gift from Feng Zhang (Addgene plasmid # 62988 ; <http://n2t.net/addgene:62988> ; RRID:Addgene\_62988). HepG2 cells were grown to 75% confluence in 10%FBS. 2.5 µg each of plasmid DNAs harboring the SELENOP targeting sgRNAs were electroporated using the Amaxa

4D Nucleofector protocol for HepG2 cells. The pmaxGFP plasmid (0.15 µg) was co-transfected to allow calculation of electroporation efficiency. After 48 hours, GFP positive (top 3%) cells were sorted as single cells into a 96 well plate containing 50% HepG2 conditioned media/ 50% DMEM F12 with 10% fetal bovine serum. The single cell clones were grown for 3 weeks and then split and screened for deletions by <sup>75</sup>Se-selenite labeling. The genome editing was confirmed using genomic DNA PCR with Herculase II enzyme.

### <sup>75</sup>Se Labeling and oxidative stress.

Cells were grown to 80% confluence and then switched to serum free media supplemented with 100 nM <sup>75</sup>Se-selenite (Research Reactor Center, University of Missouri, Columbia). After 12 hours, the media was collected and centrifuged at 2500 x g for five minutes at 4°C. The top 80% of the centrifuged media was transferred into a new tube. 1.5% of the total centrifuged media was used for analysis by 12% SDS-PAGE. The adhered cells were then gently washed with cold PBS and lysed in 1% NP-40 lysis buffer (50mM Tris-HCl pH 8.0, 150 mM sodium chloride, 1% NP-40, Roche Complete protease inhibitor). The lysate was then cleared by centrifugation at 17,000 x g for 10 min at 4°C. For oxidative stress, <sup>75</sup>Se-selenite was added 24 hours prior to lysis and the cells were treated with the indicated range hydrogen peroxide starting six hours prior to lysis. The conditioned media and cell lysate was analyzed as described above.

### Quantitative RT-PCR

Total RNA was purified using the RNAeasy kit (Qiagen). 200 ng of total RNA was converted to oligo dT primed cDNA using SuperScript III (Applied Biosystems). Gene specific forward and reverse primers were designed to amplify 57-71 base long reference and target amplicons (Table 1). Actin was used as the reference target. qRT-PCR was performed using an ABI Step One Plus Real Time PCR System (Applied Biosystems) and PCR Master Mix (ABI) with Power

SYBR Green (Invitrogen) and ROX reference Dye (Invitrogen). The total reaction volume was 20  $\mu$ l with 5  $\mu$ l of 1:5 diluted RT reaction. Working concentration of the primers in the reaction was 0.25  $\mu$ M. Thermal cycling conditions were 95°C for 10 min followed by 40 cycles of 95°C for 15 sec, 60°C for 1 min. Melt curve analysis was performed for each sample to ensure a single amplification product. Samples were analyzed in triplicate for both the reference gene and the target gene. Quantitation was performed using the comparative  $\Delta\Delta$ Ct method. We used actin as the normalizer and the calibrator sample was the endogenous human SELENOP from untreated samples. Primers in the acceptable efficiency range (90-110%) were determined using the standard curve method.

## Immunoblot analysis

For SELENOP immunoblots, 15  $\mu$ l of the lysate (10% of the total cell lysate which is ~30  $\mu$ g total protein) as described above was resolved by 12% SDS-PAGE, blotted to nitrocellulose membrane (Amersham Biosciences), blocked in 5% nonfat dried milk for 1 hour at room temperature and probed using a monoclonal horseradish peroxidase-conjugated (HRP) anti-SELENOP antibody (Thermo-Fisher 37A1) at a 1:1,000 dilution overnight. Signal was detected using the SuperSignal West Femto kit (Pierce) according to the manufacturer's protocol. For PTBP1 immunoblot a mouse monoclonal antibody (Thermo Fisher 32-4800) was used at a 1:1000 dilution.

## Affinity Chromatography.

The entire rat SELENOP 3'UTR was cloned into the pcDNA3.1 vector using the TOPO-TA cloning kit (Invitrogen). 3 copies of the viral RNA MS2 sequence separated by random sequence were synthesized commercially from IDT technologies (Table 1). These synthetic constructs were ligated downstream of the rat SELENOP 3' UTR sequence at a *Xho* I restriction



site. As a control, we also ligated viral MS2 sequence to the 3' end of a non specific sequence corresponding to a fragment of the coding region for SECISBP2L, which has a similar GC content and is of similar length as SELENOP 3'UTR (39% GC versus 31% for the SELENOP 3' UTR). The SELENOP 3'UTR and the control plasmid were linearized using *Bsb 1* and in vitro transcribed using the Ribomax kit (Promega). The RNA was then purified using p30 size exclusion columns (Bio-Rad) and quantified. The GST-MS2 protein was derived from a clone obtained from Rachel Green (HHMI) and was purified as described earlier [20].

For Bead preparation, 10 ul of magnetic glutathione beads (Pierce) were incubated with 100 µg of purified GST-MS2 protein for 2 hours at 4°C in buffer A (20 mM Tris-OAc, pH 7.5, 100 mM KOAc, 2 mM DTT, 2.5 mM Mg(OAc)<sub>2</sub>, 0.25 mM spermidine, 0.4 mM GTP). The protein-bound beads were then washed with buffer A three times (10 minutes each) and then incubated with 10 µg of in vitro transcribed MS2 tagged RNA in buffer A containing 1 U/µl RNAsin for an hour and again washed with buffer A. The beads were then incubated with precleared cell lysate for 2 hours at 4°C and then washed buffer A three times (10 minutes each) and eluted with Buffer A plus 1 M NaCl for 20 minutes. The elution was sent for LC MS/MS analysis for peptide identification at the Rutgers Biological Mass Spectrometry Facility where MudPIT analysis was performed as previously described [21].

## UV Crosslinking

Plasmids containing the SELENOP 3' UTR fragments or mutants were linearized with *Not I* and transcribed with T7 RNA polymerase in the presence of [32P]-α-UTP (Perkin Elmer). Recombinant GST-PTBP1 was incubated with 20 fmol [32P]-α-UTP labeled fragments. Following incubation, complexes were UV irradiated at 254 nm for 10 min on ice and subsequently treated with 20 µg RNase A for 15 min at 37 °C. Samples were resolved by 10% SDS-PAGE, and visualized by phosphorimaging. For the mutants in this study, we replaced the

U-rich stretches in the interSECIS with either of the other 3 nucleotides. In addition, we also created a version where most of the U residues in the interSECIS were changed to A (see Figure 3 for sequences).

## Recombinant GST-PTBP1 preparation

GST-PTBP1 was expressed and purified from a construct provided by Lori Covey (Rutgers University). The protein was produced in *E. coli* similar to the GST-MS2 procedure [20] and then purified on a glutathione-Sepharose column (GE Healthcare). Following elution, the purified GST-PTB was dialyzed against dilution buffer (50 mM HEPES, pH 7.6, 1 mM DTT, 1 mM MgCl<sub>2</sub> and 20 % glycerol) and stored at -80 °C.

## RNA-immunoprecipitation (RNA-IP)

Wild type and CRISPR mutated HepG2 cells were grown in EMEM complete media and collected at 80% confluence. Cells were placed on ice and washed three times with ice cold PBS, then lysed for 10 min on ice with IP lysis buffer (10 mM Tris-HCl pH 7.6, 150 mM NaCl, 0.5% NP-40, 5% Glycerol and Roche protease inhibitor). Lysates were centrifuged at 17,000 × g for 10 min and supernatant incubated overnight at 4 °C with 2 µg of anti-PTBP1 antibody (monoclonal-ThermoFisher) or anti-FLAG antibody (monoclonal-Sigma). Bound proteins were pulled down using the Dynabeads Protein G Kit (Life Technologies). After pull-down, 10% of beads were boiled for 5 minutes at 95 °C in SDS sample buffer and proteins were resolved on a 12% SDS-PAGE gel. The gel was blotted onto nitrocellulose and probed with 1:1000 anti-PTBP1 antibody. The remaining beads were used for total RNA extraction using Trizol reagent. cDNA synthesis was performed with both gene specific primers and oligodT and PCR amplified using the RNA-IP primers shown in Table 1.

## ACKNOWLEDGEMENTS

We acknowledge technical support from Joanna Duong. Thanks to Dr. Lori Covey (Rutgers Department of Cell Biology and Neuroscience) for providing the plasmid encoding GST-PTBP1.

## FUNDING

This work was supported by the National Institutes of Health [GM077073 to P.R.C]

## REFERENCES

- [1] L. Latrèche, O. Jean-Jean, D.M. Driscoll, L. Chavatte, Novel structural determinants in human SECIS elements modulate the translational recoding of UGA as selenocysteine, *Nucleic Acids Res.* 37 (2009) 5868–5880.
- [2] E.M. Cockman, V. Narayan, B. Willard, S.P. Shetty, P.R. Copeland, D.M. Driscoll, Identification of the Selenoprotein S Positive UGA Recoding (SPUR) element and its position-dependent activity, *RNA Biol.* 16 (2019) 1682–1696.
- [3] J.E. Curran, J.B.M. Jowett, K.S. Elliott, Y. Gao, K. Gluschenko, J. Wang, D.M. Abel Azim, G. Cai, M.C. Mahaney, A.G. Comuzzie, T.D. Dyer, K.R. Walder, P. Zimmet, J.W. MacCluer, G.R. Collier, A.H. Kissebah, J. Blangero, Genetic variation in selenoprotein S influences inflammatory response, *Nat. Genet.* 37 (2005) 1234–1241.
- [4] J.N. Gonzalez-Flores, S.P. Shetty, A. Dubey, P.R. Copeland, The molecular biology of selenocysteine, *Biomol. Concepts.* 4 (2013) 349–365.
- [5] Y. Saito, Selenoprotein P as an in vivo redox regulator: disorders related to its deficiency and excess, *J. Clin. Biochem. Nutr.* 66 (2020) 1–7.
- [6] S. Kurokawa, S. Eriksson, K.L. Rose, S. Wu, A.K. Motley, S. Hill, V.P. Winfrey, W.H. McDonald, M.R. Capecchi, J.F. Atkins, E.S.J. Arnér, K.E. Hill, R.F. Burk, Sepp1(UF) forms are N-terminal selenoprotein P truncations that have peroxidase activity when coupled with thioredoxin reductase-1, *Free Radic. Biol. Med.* 69 (2014) 67–76.
- [7] Z. Stoytcheva, R.M. Tujebajeva, J.W. Harney, M.J. Berry, Efficient incorporation of multiple selenocysteines involves an inefficient decoding step serving as a potential translational checkpoint and ribosome bottleneck, *Mol. Cell. Biol.* 26 (2006) 9177–9184.
- [8] S.M. Fixsen, M.T. Howard, Processive selenocysteine incorporation during synthesis of eukaryotic selenoproteins, *J. Mol. Biol.* 399 (2010) 385–396.
- [9] S.P. Shetty, R. Shah, P.R. Copeland, Regulation of selenocysteine incorporation into the selenium transport protein, selenoprotein P, *J. Biol. Chem.* 289 (2014) 25317–25326.
- [10] M.J. Selby, B.M. Peterlin, Trans-activation by HIV-1 Tat via a heterologous RNA binding protein, *Cell.* 62 (1990) 769–776.
- [11] M.G. Romanelli, E. Diani, P.M.-J. Lievens, New insights into functional roles of the polypyrimidine tract-binding protein, *Int. J. Mol. Sci.* 14 (2013) 22906–22932.
- [12] M.V. Gerashchenko, A.V. Lobanov, V.N. Gladyshev, Genome-wide ribosome profiling reveals complex translational regulation in response to oxidative stress, *Proc. Natl. Acad. Sci. U. S. A.* 109 (2012) 17394–17399.
- [13] H. Tani, A. Numajiri, M. Aoki, T. Umemura, T. Nakazato, Short-lived long noncoding RNAs as surrogate indicators for chemical stress in HepG2 cells and their degradation by nuclear RNases, *Sci. Rep.* 9 (2019) 1–10.
- [14] N.M. Keppetipola, K.-H. Yeom, A.L. Hernandez, T. Bui, S. Sharma, D.L. Black, Multiple determinants of splicing repression activity in the polypyrimidine tract binding proteins, PTBP1 and PTBP2, *RNA.* 22 (2016) 1172–1180.
- [15] C. Mayr, What Are 3' UTRs Doing?, *Cold Spring Harb. Perspect. Biol.* 11 (2019). <https://doi.org/10.1101/cshperspect.a034728>.
- [16] N. Miya, A. Uratani, K. Chikamoto, Y. Naito, K. Terao, Y. Yoshikawa, H. Yasui, Effects of exercise on biological trace element concentrations and selenoprotein P expression in rats with fructose-induced glucose intolerance, *J. Clin. Biochem. Nutr.* 66 (2020) 124–131.
- [17] M. Mariotti, S. Shetty, L. Baird, S. Wu, G. Loughran, P.R. Copeland, J.F. Atkins, M.T. Howard, Multiple RNA structures affect translation initiation and UGA redefinition efficiency during synthesis of selenoprotein P, *Nucleic Acids Res.* 45 (2017) 13004–13015.
- [18] S.P. Shetty, R. Sturts, M. Vetick, P.R. Copeland, Processive incorporation of multiple

selenocysteine residues is driven by a novel feature of the selenocysteine insertion sequence, *J. Biol. Chem.* 293 (2018) 19377–19386.

- [19] F.A. Ran, P.D. Hsu, J. Wright, V. Agarwala, D.A. Scott, F. Zhang, Genome engineering using the CRISPR-Cas9 system, *Nat. Protoc.* 8 (2013) 2281–2308.
- [20] E.M. Youngman, R. Green, Affinity purification of in vivo-assembled ribosomes for in vitro biochemical analysis, *Methods.* 36 (2005) 305–312.
- [21] X.-J. Xie, F.-N. Hsu, X. Gao, W. Xu, J.-Q. Ni, Y. Xing, L. Huang, H.-C. Hsiao, H. Zheng, C. Wang, Y. Zheng, A.M. Xiaoli, F. Yang, S.E. Bondos, J.-Y. Ji, CDK8-Cyclin C Mediates Nutritional Regulation of Developmental Transitions through the Ecdysone Receptor in *Drosophila*, *PLoS Biol.* 13 (2015) e1002207.

## TABLE

Table 1. Oligonucleotide sequences used in this study.

|                        |                                                                                                                                                                                                               |
|------------------------|---------------------------------------------------------------------------------------------------------------------------------------------------------------------------------------------------------------|
| SELENOP qPCR Fwd       | CTAGGAGCTGATGCTGCCATT                                                                                                                                                                                         |
| SELENOP qPCR Rev       | GGTGATTGCAGACCCTGTTTTT                                                                                                                                                                                        |
| Actin qPCR Fwd         | GCGCGGCTACAGCTTCA                                                                                                                                                                                             |
| Actin qPCR Rev         | CTTAATGTCACGCACGATTTCC                                                                                                                                                                                        |
| Genomic PCR Primer Fwd | ATATTTAAAATAGGACATACTCCCC                                                                                                                                                                                     |
| Genomic PCR Primer Rev | CAGCTTTAAGGTTTTTATTGAATTTATTTG                                                                                                                                                                                |
| MS2 sequence           | CTCGAGACTAGTAGATCTTTTTTTACTAGTAGATCTTTTTT<br>TGATGAGGATTACCCATCACTAGTAGATCTTTTTTTGATGA<br>GGATTACCCATCACTAGTAGATCTTTTTTTACTAGTAGATC<br>TTTTTTTGATGAGGATTACCCATCACTAGTAGATCTTTTTT<br>TACTAGTAGATCTTTTTTTCTCGAG |
| RNA-IP Fwd             | CAACTGAAAGGTGATTGCAGCTTTTGGT                                                                                                                                                                                  |

|            |                                  |
|------------|----------------------------------|
| RNA-IP Rev | AGGAGGTCAGGTTTATAGGGTTTGGTT TACC |
|------------|----------------------------------|

## FIGURES AND FIGURE CAPTIONS

**Figure 1.** Conservation of non-SECIS regions of the SELENOP 3' UTR. A) Diagram and multiple sequence alignment of the mammalian SELENOP 3' UTR. The alignment of sequences from the species indicated was performed using the MUSCLE algorithm, identical positions are black.

**Figure 2.** RNA affinity chromatography identifies PTBP1 and other SELENOP 3' UTR binding proteins. A) SDS PAGE analysis of rat liver proteins eluted from a GST-MS2 column bound with either control RNA, SELENOP 3' UTR (FL 3' UTR), and the interSECIS deletion mutant ( $\Delta$ Inter). The gel was stained with Coomassie and the bands of interest excised from the gel for LC MS/MS analysis. B) SDS PAGE and C) immunoblot analysis of proteins eluted from RNA affinity experiments as described in A) except that HepG2 lysate was used. The immunoblot was probed with anti-PTBP1 antibody. D) Peptide counts and cognate genes that were identified by LC MS/MS MudPIT analysis after RNA chromatography using control RNA (Cntl), wild-type SELENOP 3' UTR (WT) and an RNA lacking the first 273 nt of the SELENOP 3' UTR ( $\Delta$ 273). The ratio of peptide counts from WT UTR versus control RNA is shown (WT:Cntr). The genes shown here correspond to those with a ratio of 5 or above and a peptide count of 10 or above.

**Figure 3.** Recombinant PTBP1 binds directly to the SELENOP 3' UTR. A) Line diagram of the SELENOP 3' UTR with canonical U-rich PTBP1 binding sites annotated as green arrows. The four regions that were mutated are indicated with arrows. B) sequence alignments showing the mutations that were made in the interSECIS region of the SELENOP 3' UTR with wild-type sequences on top and the mutated sites highlighted in red. C) SDS PAGE of recombinant GST-PTBP1 protein UV-crosslinked to  $^{32}$ P-UTP labeled RNA fragments as indicated in A) and B). As a negative control, GST-MS2 coat protein was used as indicated.

**Figure 4.** Editing of the SELENOP gene in HepG2 cells. A) Diagram of the SELENOP 3' UTR indicating the sequences deleted by CRISPR/Cas9 genome editing. Sequence traces of the deleted regions are shown below. B) genomic PCR (left panel) and RT-PCR (right panel) with primers flanking the deletion sites. C) Lysates from wild-type (WT) and interSECIS deletion ( $\Delta$ Inter) and preSECIS deletion ( $\Delta$ Pre) HepG2 cells were subjected to RNA-IP using the anti-PTBP1 or anti-FLAG control antibodies. RNA was extracted from immunoprecipitates and analyzed for SELENOP mRNA levels by limited cycle RT-PCR.

**Figure 5.** Hydrogen peroxide treatment reveals a regulatory role for the interSECIS sequence. A) Wild-type (wt) or interSECIS deletion mutant HepG2 cells were treated with the hydrogen peroxide concentrations indicated and 100 nM  $^{75}\text{Se}$ -selenite for 6 hours. 30  $\mu\text{l}$  of conditioned media was analyzed by SDS PAGE followed by immunoblot (top) or phosphorimaging (bottom). Full length (FL) and truncated (term) SELENOP resulting from early termination at the second UGA codon are indicated with arrows. B) Quantitation of the band corresponding to full length (FL) SELENOP from the phosphorimage. C) Total RNA was isolated from these cells and analyzed by qRT-PCR normalized to actin and the wt set to 1. For B and C, data were plotted as the mean with error bars showing standard deviation. A Student's t-test was used to calculate the p values shown on three biological replicates.

**Figure 6.** Limiting selenium reveals a role for the PreSECIS region. A) HepG2 cells were incubated with increasing concentrations of sodium selenite as indicated. 30  $\mu\text{l}$  of conditioned medium was analyzed by SDS PAGE followed by immunoblot probed with anti-SELENOP antibody. B) Same as in A) except  $^{75}\text{Se}$ -selenite was used to supplement. SDS-PAGE was of conditioned media (top panels) or lysate (bottom panels) was analyzed by phosphorimage analysis and Coomassie Stain (top panels). C) Quantitation of the phosphorimage data derived from conditioned media. D) Quantitation of the phosphorimage data derived from conditioned media. E) Total RNA was isolated from the cell lines indicated with and without 50 nM selenium



supplementation and analyzed by qRT-PCR normalized to actin and the wt set to 1. For all quantification, a Student's t-test was used to calculate the p values shown on three biological replicates.

**Figure S1.** Schematic of RNA affinity chromatography showing recovery of RNA when the MS2 containing sequences were used. Eluate was analyzed by agarose gel electrophoresis stained with SYBR Safe.

**Figure S2.** SELENOP UTR mutations do not affect intracellular selenoprotein production. Cell lysates derived from the <sup>75</sup>Se-selenite labeling described for Figure 5 were analyzed by SDS-PAGE followed by phosphorimage analysis

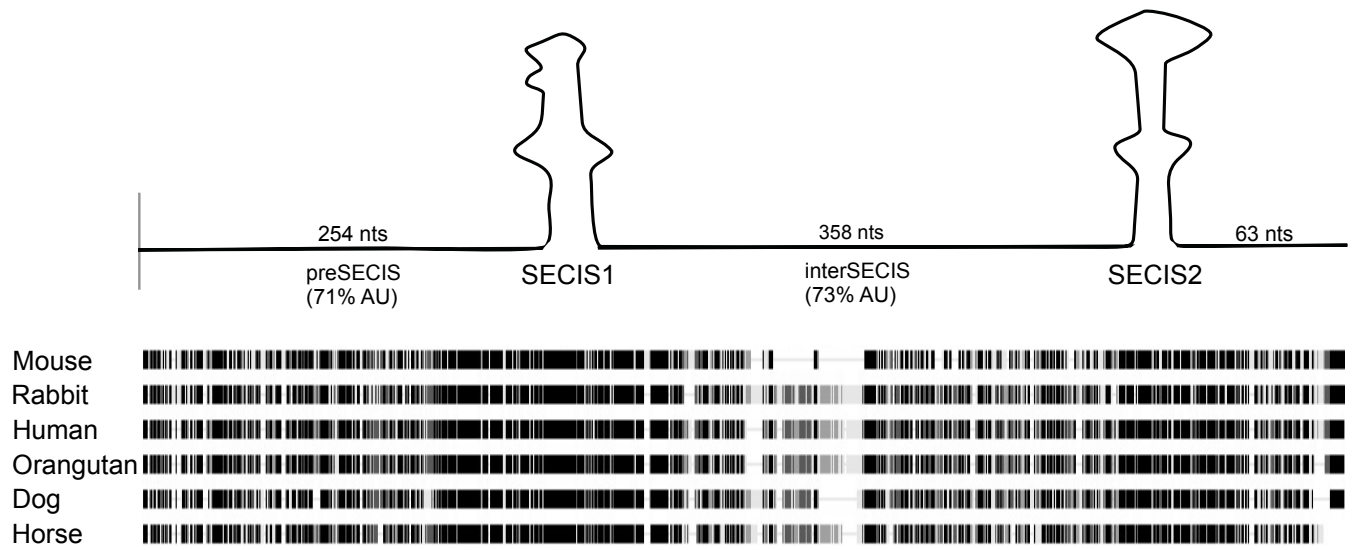

**A**

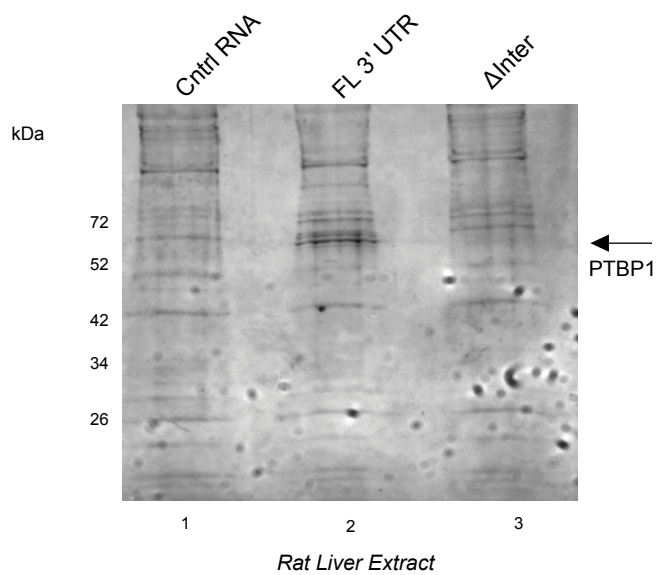

**B**

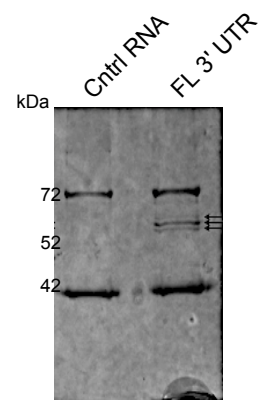

**C**

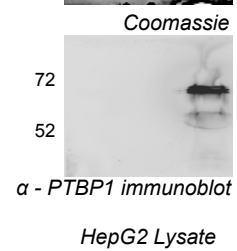



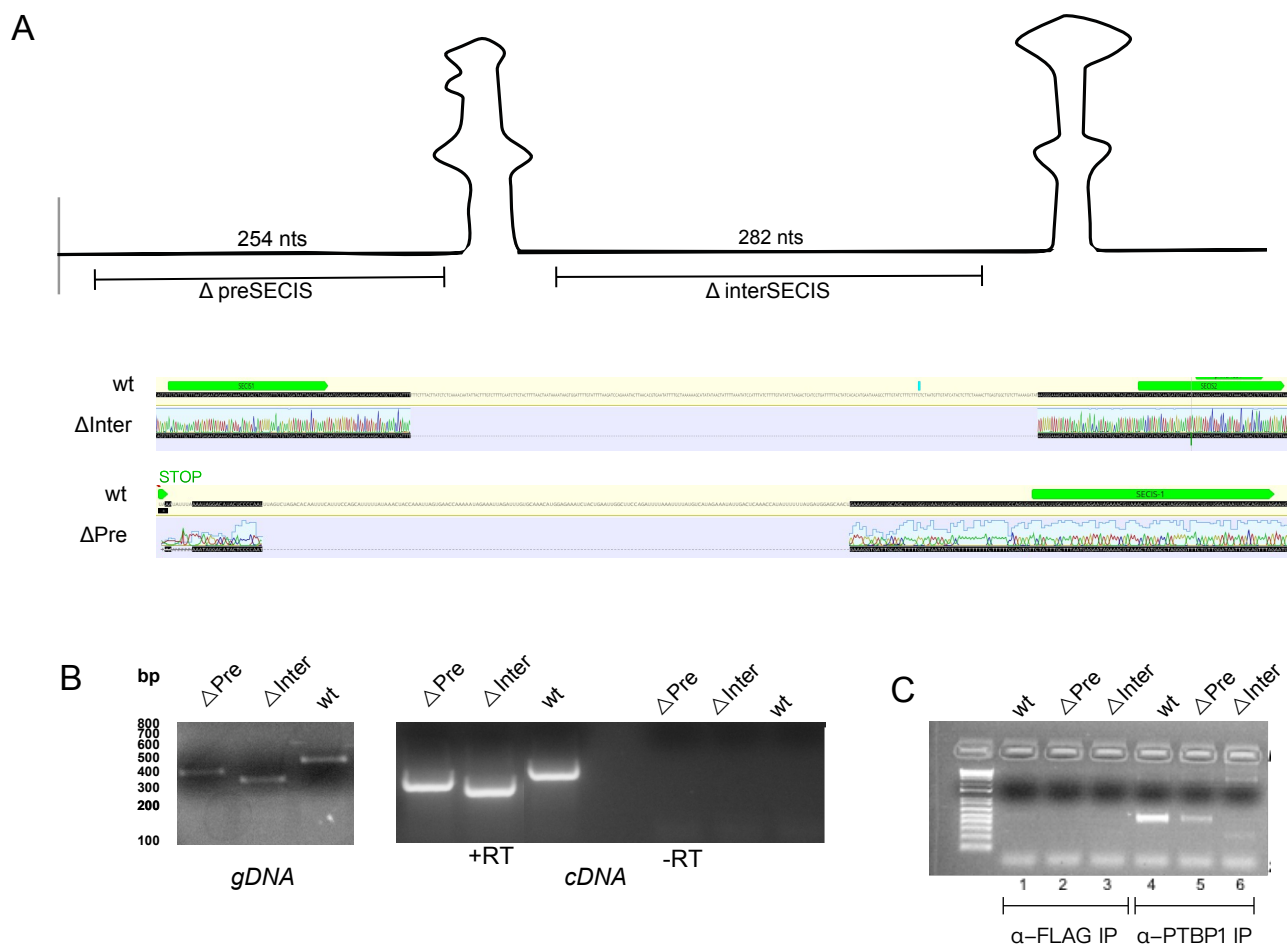

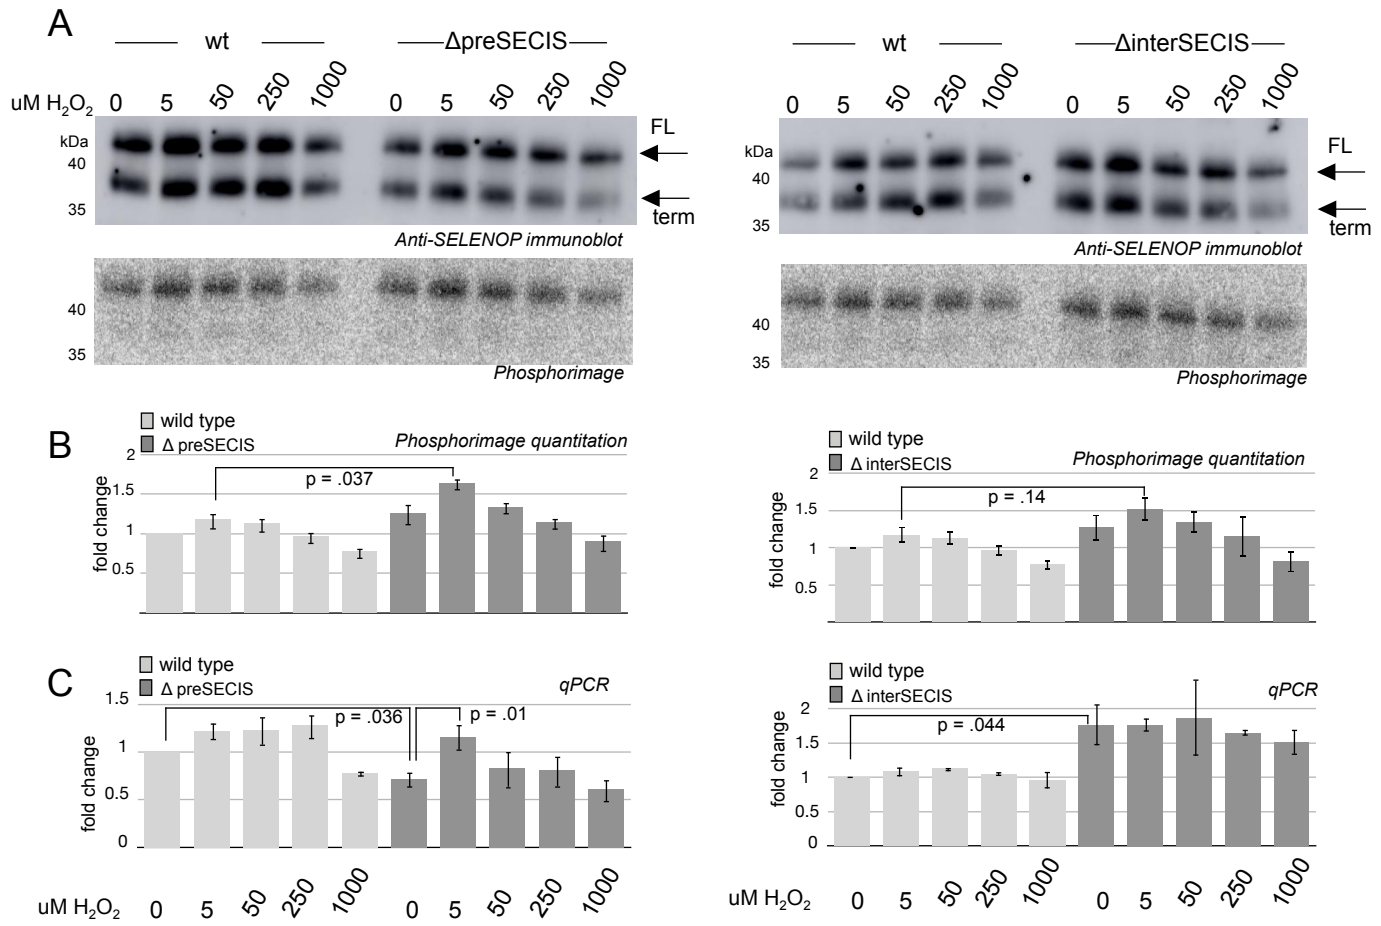

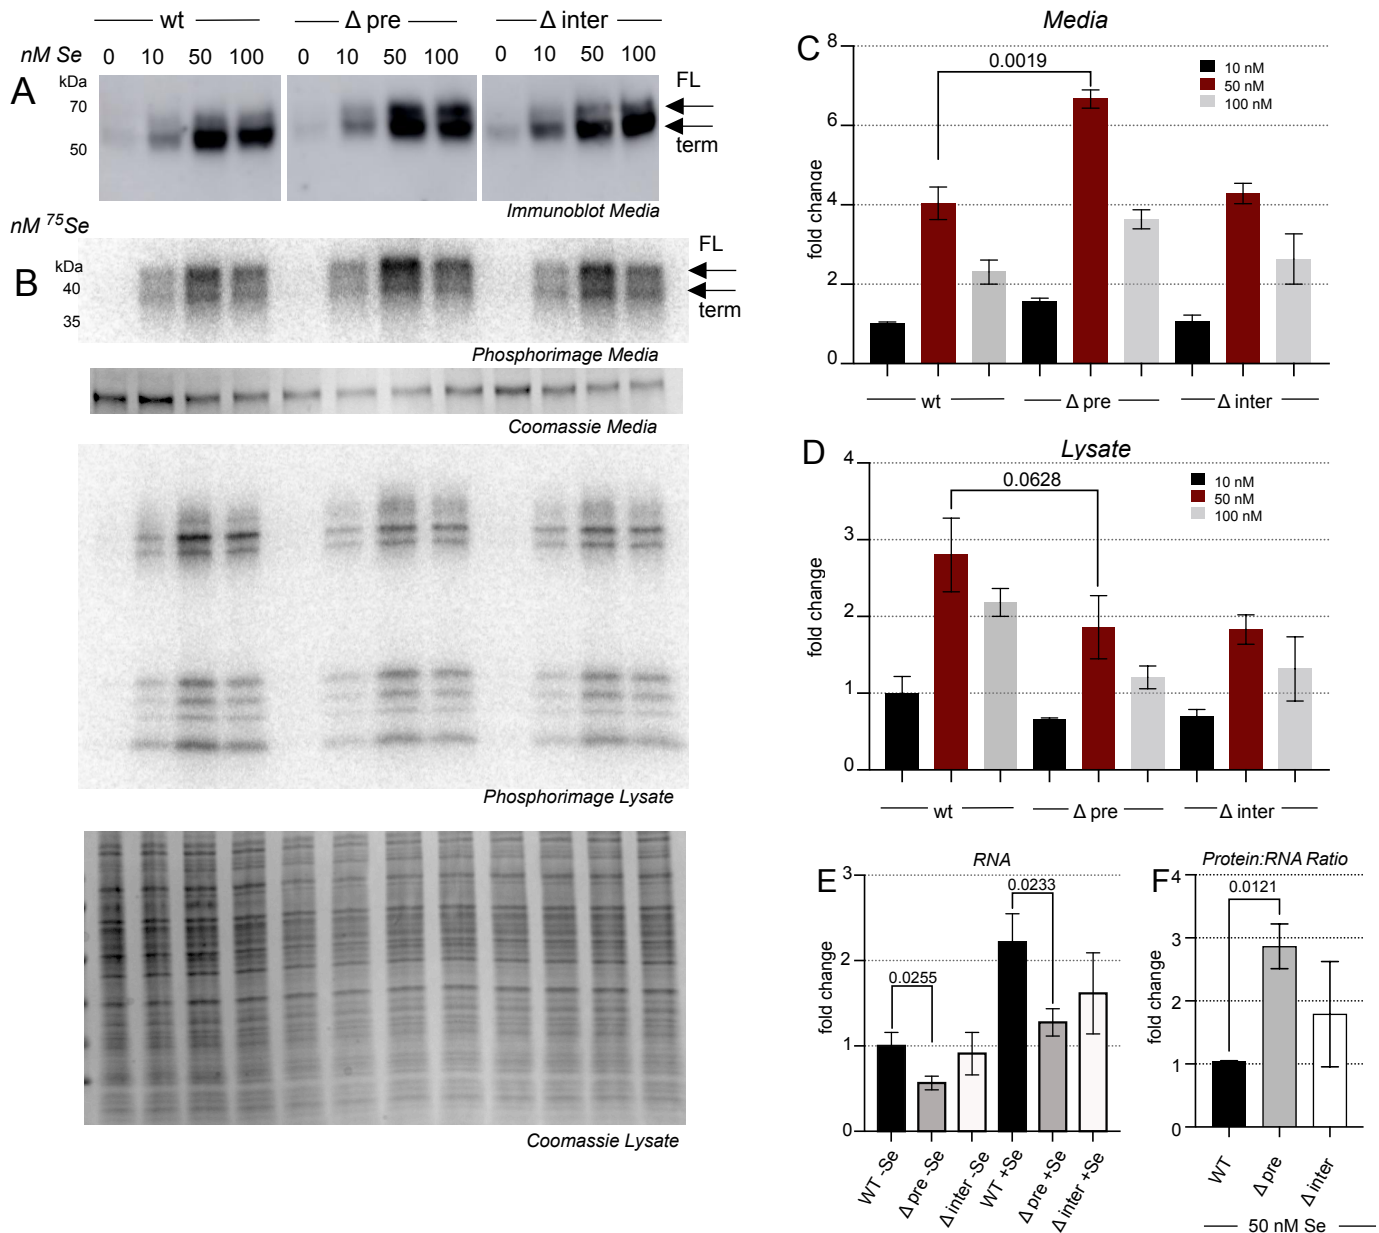

**G**

| Ensembl Gene ID     | Gene Name                                                            | Peptide Counts |      |     |         |
|---------------------|----------------------------------------------------------------------|----------------|------|-----|---------|
|                     |                                                                      | Cntr           | Δ273 | WT  | WT:Cntr |
| ENSRNOG00000010448  | PTBP1 (polypyrimidine tract-binding protein 1 isoform b)             | 19             | 520  | 782 | 41      |
| ENSRNOG00000019875  | MATR3 (Matrin-3)                                                     | 5              | 150  | 162 | 32      |
| ENSRNOG00000020235  | HNRNPL (heterogeneous nuclear ribonucleoprotein L)                   | 21             | 56   | 112 | 5       |
| ENSRNOG00000020710  | RAVER1 (ribonucleoprotein, PTB-binding 1)                            | 1              | 49   | 96  | 96      |
| ENSRNOG00000010827  | PTBP2 (polypyrimidine tract binding protein 2)                       | 1              | 49   | 80  | 80      |
| ENSRNOG00000016334  | PTBP3 (polypyrimidine tract binding protein 3)                       | 1              | 74   | 73  | 73      |
| ENSRNOG00000002408  | RBM47 (RNA binding motif protein 47)                                 | 1              | 19   | 55  | 55      |
| ENSRNOG00000001069  | ELAV1 (ELAV-like protein 1)                                          | 1              | 16   | 54  | 54      |
| ENSRNOG00000019113  | HNRNPK (heterogeneous nuclear ribonucleoprotein K)                   | 7              | 3    | 37  | 5       |
| ENSRNOG00000013773  | SECISBP2 (selenocysteine insertion sequence-binding protein 2)       | 3              | 39   | 32  | 11      |
| ENSRNOG000000033195 | A1CF (APOBEC1 complementation factor)                                | 1              | 18   | 28  | 28      |
| ENSRNOG00000002292  | HNRNPD (heterogeneous nuclear ribonucleoprotein D)                   | 1              | 14   | 22  | 22      |
| ENSRNOG00000003645  | HNRNPAB (heterogeneous nuclear ribonucleoprotein A/B)                | 4              | 11   | 22  | 6       |
| ENSRNOG00000008629  | SECISBP2L (selenocysteine insertion sequence-binding protein 2-like) | 3              | 25   | 20  | 7       |
| ENSRNOG00000018295  | CCAR2 (cell cycle and apoptosis regulator 2)                         | 1              | 1    | 15  | 15      |
| ENSRNOG00000006929  | HNRNPLL (heterogeneous nuclear ribonucleoprotein L-like)             | 1              | 2    | 11  | 11      |

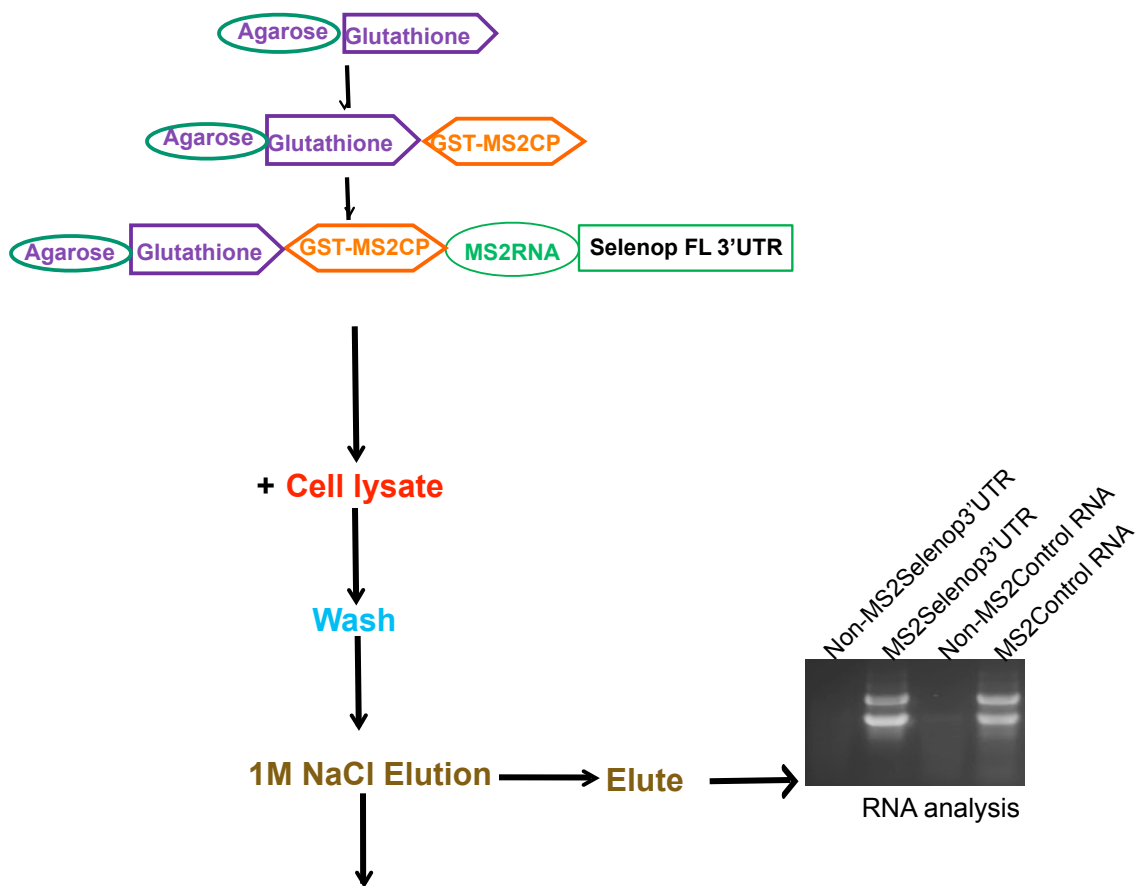



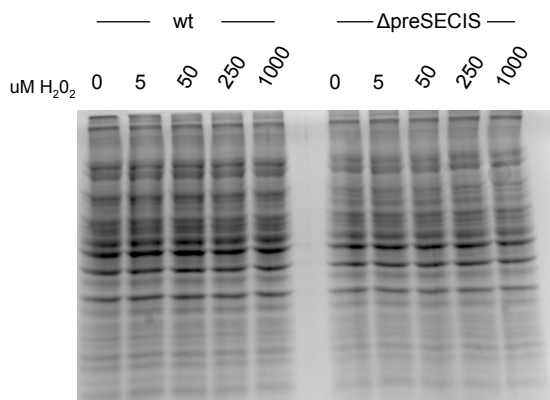

Coomassie

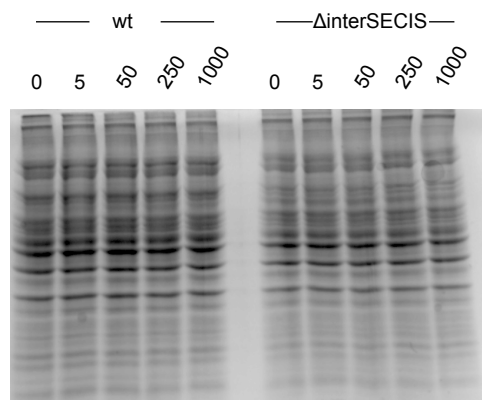

Coomassie

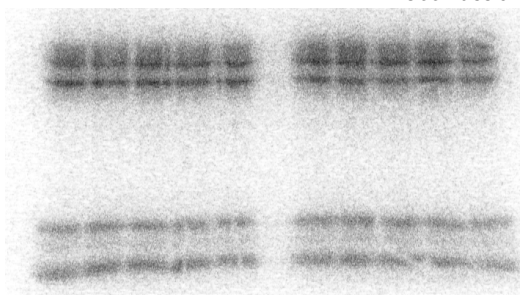

Phosphorimage

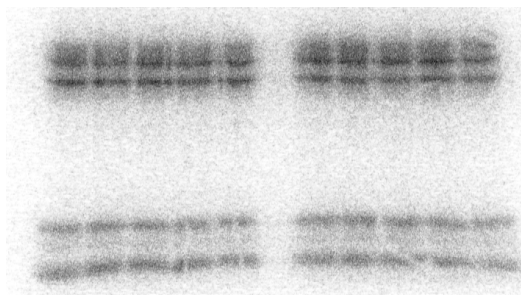

Phosphorimage
